# Supplementary material for: Synthesis, optical and electrochemical properties of small molecules DMM-TPA[DTS(FBTTh3)3] and TPA[DTS(FBTTh3)3], and their application as donors for bulk heterojunction solar cells
Source: Royal Society of Chemistry journal article supplement (doi:10.1039/c4ta01768d), 2014-01-01
Supplement: c4ta01768d1.pdf [file c4ta01768d1.pdf]

## Supplementary Information

### Synthesis, optical and electrochemical properties of small molecules DMM-TPA[DTS(FBTTh<sub>3</sub>)<sub>3</sub>] and TPA[DTS(FBTTh<sub>3</sub>)<sub>3</sub>] and their application as donors for bulk heterojunction solar cells

Nara Cho, <sup>a</sup> Sanhhyun Paek, <sup>a</sup> Jihye Jeon, <sup>b</sup> Kihyung Song, <sup>b</sup> G. D. Sharma, <sup>\*c</sup> and Jaejung Ko <sup>\*a</sup>

<sup>a</sup>Department of Materials Chemistry, Korea University, Chungnam 330-700, Republic of Korea. Fax: +82-44-860-1331; Tel: +82-44-860-1337; E-mail: [jko@korea.ac.kr](mailto:jko@korea.ac.kr)

<sup>b</sup>Department of Chemical Education, Korea National University of Education, Chungbuk, 363-791, Republic of Korea

<sup>c</sup>R & D center for Engineering and Science, JEC group of colleges, Jaipur Engineering College campus, Kukas, Jaipur (Raj.), India; E-mail: [gdsharma273@gmail.com](mailto:gdsharma273@gmail.com)

\*Corresponding authors

### Content

**S1.** Isodensity surface plots of **DMM-TPA[DTS(FBTTh<sub>3</sub>)<sub>3</sub>] (1)** and **TPA[DTS(FBTTh<sub>3</sub>)<sub>3</sub>] (2)** calculated by the time dependent-density functional theory (TD-DFT) using the B3LYP functional/6-31G\* basis set.

**Table S1.** Calculated excitation energy characteristics of the **DMM-TPA[DTS(FBTTh<sub>3</sub>)<sub>3</sub>] (1)** and **TPA[DTS(FBTTh<sub>3</sub>)<sub>3</sub>] (2)**

**Table S2.** Photovoltaic parameters of devices with different weight ratio of small molecules and PC<sub>71</sub>BM

**Table S3.** Photovoltaic parameters of the devices based on 1:PC<sub>71</sub>BM processed with different concentration of DIO in CB

### Reference

**S1.** Isodensity surface plots of **DMM-TPA[DTS(FBTTh<sub>3</sub>)<sub>3</sub>] (1)** and **TPA[DTS(FBTTh<sub>3</sub>)<sub>3</sub>] (2)** calculated by the time dependent-density functional theory (TD-DFT) using the B3LYP functional/6-31G\* basis set.

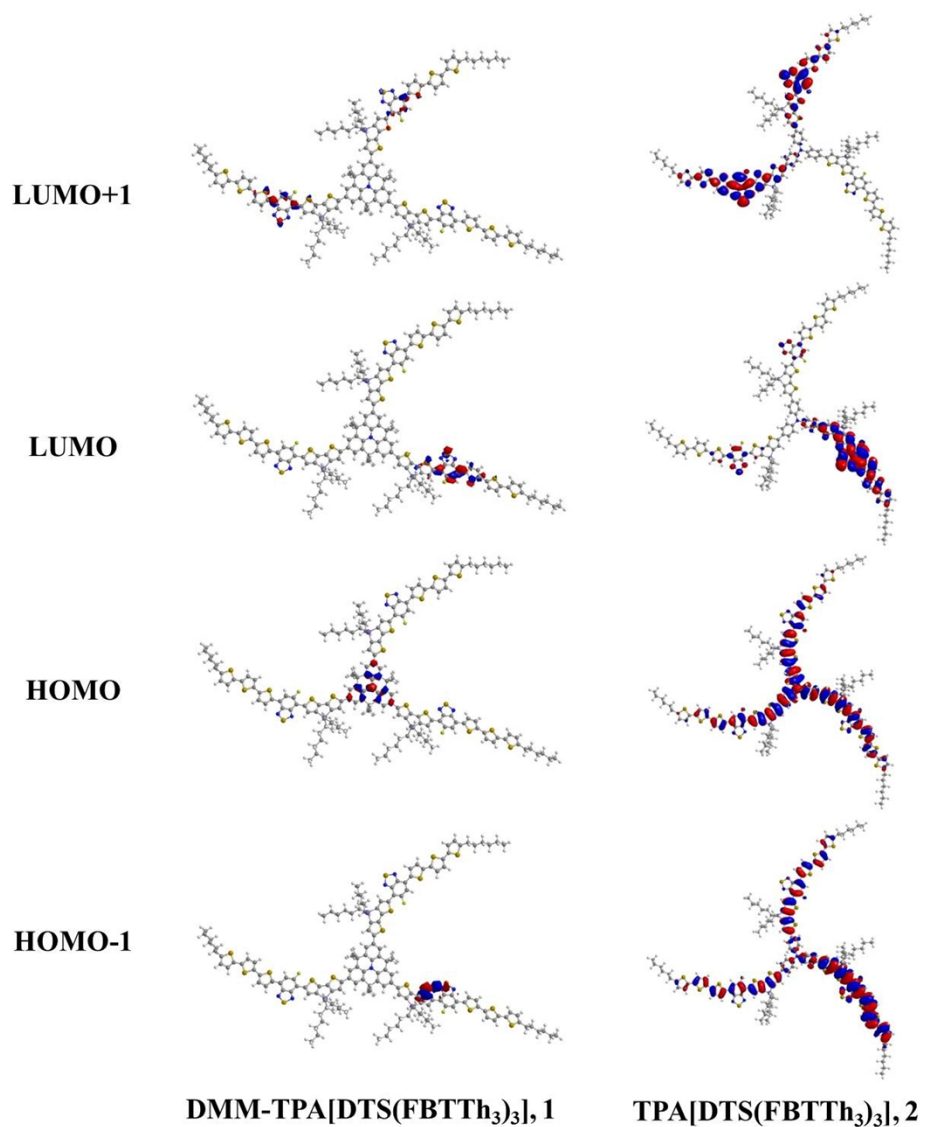

**Table S1.** Calculated excitation energy characteristics of the **DMM-TPA[DTS(FBTTh<sub>3</sub>)<sub>3</sub>] (1)** and **TPA[DTS(FBTTh<sub>3</sub>)<sub>3</sub>] (2)** <sup>[a]</sup>

| Compounds | E(eV)/nm    | <i>f</i> <sup>[b]</sup> | Composition (%) <sup>[c]</sup>                                                             |
|-----------|-------------|-------------------------|--------------------------------------------------------------------------------------------|
| <b>1</b>  | 1.525/812.8 | 1.511                   | 64 (HOMO → LUMO)<br>11 (HOMO-2 → LUMO)                                                     |
|           | 1.535/807.8 | 0.548                   | 18 (HOMO → LUMO)<br>62 (HOMO → LUMO+1)                                                     |
|           | 1.810/684.8 | 1.272                   | 52 (HOMO-2 → LUMO)<br>15 (HOMO-2 → LUMO+1)<br>15 (HOMO-2 → LUMO+2)<br>35 (HOMO-1 → LUMO+1) |
|           | 1.832/677.0 | 0.536                   | 12 (HOMO-3 → LUMO+2)<br>22 (HOMO-2 → LUMO+1)<br>46 (HOMO-1 → LUMO+1)                       |
|           |             |                         |                                                                                            |
| <b>2</b>  | 1.557/796.1 | 1.361                   | 67 (HOMO → LUMO)<br>14 (HOMO-1 → LUMO)                                                     |
|           | 1.580/784.7 | 1.272                   | 16 (HOMO-2 → LUMO+2)<br>66 (HOMO → LUMO+1)                                                 |
|           | 1.803/687.7 | 0.545                   | 66 (HOMO-1 → LUMO)<br>14 (HOMO-1 → LUMO+2)                                                 |
|           | 1.829/677.8 | 0.656                   | 22 (HOMO-2 → LUMO)<br>39 (HOMO-1 → LUMO+1)<br>21 (HOMO → LUMO+1)                           |
|           | 1.838/674.4 | 0.314                   | 50 (HOMO-2 → LUMO+1)<br>11 (HOMO-1 → LUMO)<br>12 (HOMO-1 → LUMO+1)                         |

[a] The characteristics were calculated by the time dependent-density functional theory (TD-DFT) using the B3LYP functional/6-31G\* basis set  
[b] The oscillator strength (*f*) of a transition is a measure of its intensity and is related to the molar absorption coefficient  
[c] The composition means contribution of each transition for excitation energies.

Table S2

Photovoltaic parameters of devices based 1: PC<sub>71</sub>BM and 2:PC<sub>71</sub>BM with different weight ratio

|                            | w/w ratio                  | J <sub>sc</sub> (mA/cm <sup>2</sup> ) | V <sub>oc</sub> (V) | FF   | PCE (%) |
|----------------------------|----------------------------|---------------------------------------|---------------------|------|---------|
| <b>1:PC<sub>71</sub>BM</b> | <b>1:1</b>                 | 8.45                                  | 0.67                | 0.42 | 2.38    |
|                            | <b>1:2</b>                 | 9.18                                  | 0.68                | 0.46 | 2.87    |
|                            | <b>1:3</b>                 | 8.94                                  | 0.66                | 0.44 | 2.60    |
|                            | <b>1:4</b>                 | 8.46                                  | 0.66                | 0.40 | 2.23    |
|                            | <b>2:PC<sub>71</sub>BM</b> | <b>1:1</b>                            | 7.86                | 0.68 | 0.38    |
|                            | <b>1:2</b>                 | 8.54                                  | 0.70                | 0.42 | 2.51    |
|                            | <b>1:3</b>                 | 8.23                                  | 0.70                | 0.40 | 2.30    |
|                            | <b>1:4</b>                 | 7.96                                  | 0.68                | 0.36 | 1.95    |

**Table S3.** Photovoltaic parameters of the devices based on 1:PC<sub>71</sub>BM processed with different concentration of DIO in CB

| Concentration by volume % | J <sub>sc</sub> (mA/cm <sup>2</sup> ) | V <sub>oc</sub> (V) | FF   | PCE (%) |
|---------------------------|---------------------------------------|---------------------|------|---------|
| 1%                        | 9.67                                  | 0.68                | 0.48 | 3.16    |
| 2%                        | 9.92                                  | 0.68                | 0.50 | 3.37    |
| 3%                        | 10.78                                 | 0.66                | 0.54 | 3.84    |
| 4%                        | 12.62                                 | 0.66                | 0.62 | 5.16    |
| 5%                        | 10.46                                 | 0.64                | 0.53 | 3.54    |

## Reference

1. Cho, N.; Song, K.; Lee, J. K.; Ko, J. *Chem. Eur. J.* **2012**, *18*, 11433-11439
2. Paek, S.; Cho, N; Cho, S.; Lee, J. K; Ko, J. *Org. Lett.*, **2012**, *14*, 6326-6329
